# Supplementary material for: Tuning the selectivity of highly sensitive chemiresistive nanoparticle networks by encapsulation with metal–organic frameworks
Source: Royal Society of Chemistry journal article supplement (doi:10.1039/d1tc03606h), 2021-01-01
Supplement: d1tc03606h1.pdf [file d1tc03606h1.pdf]

## Supporting Information

### **Tuning the Selectivity of Highly Sensitive Chemiresistive Nanoparticle Networks by Encapsulation with Metal-Organic Frameworks**

*Alishba T. John*<sup>a</sup>, *Krishnan Murugappan*\*<sup>a</sup>, *Mahdiar Taheri*<sup>b</sup>, *David R. Nisbet*<sup>c,d</sup> and *Antonio Tricoli*\*<sup>a,e</sup>

<sup>a</sup>Nanotechnology Research Laboratory, Research School of Chemistry, College of Science, Australian National University, Canberra, ACT 2601, Australia

<sup>b</sup>Research School of Electrical, Energy and Materials Engineering, The Australian National University, Canberra 2601, Australia

<sup>c</sup>Laboratory of Advanced Biomaterials, Research School of Chemistry and the John Curtin School of Medical Research, Australian National University, Canberra, ACT 2601, Australia

<sup>d</sup>The Graeme Clark Institute, Faculty of Engineering and Information Technology & Faculty of Medicine, Dentistry and Health Services, The University of Melbourne, Melbourne, Australia

<sup>e</sup>Nanotechnology Research Laboratory, Faculty of Engineering, University of Sydney, Sydney, NSW 2006, Australia

\*Corresponding authors: Krishnan Murugappan and Antonio Tricoli

E-mail: [krishnan.murugappan@anu.edu.au](mailto:krishnan.murugappan@anu.edu.au); [antonio.tricoli@anu.edu.au](mailto:antonio.tricoli@anu.edu.au)

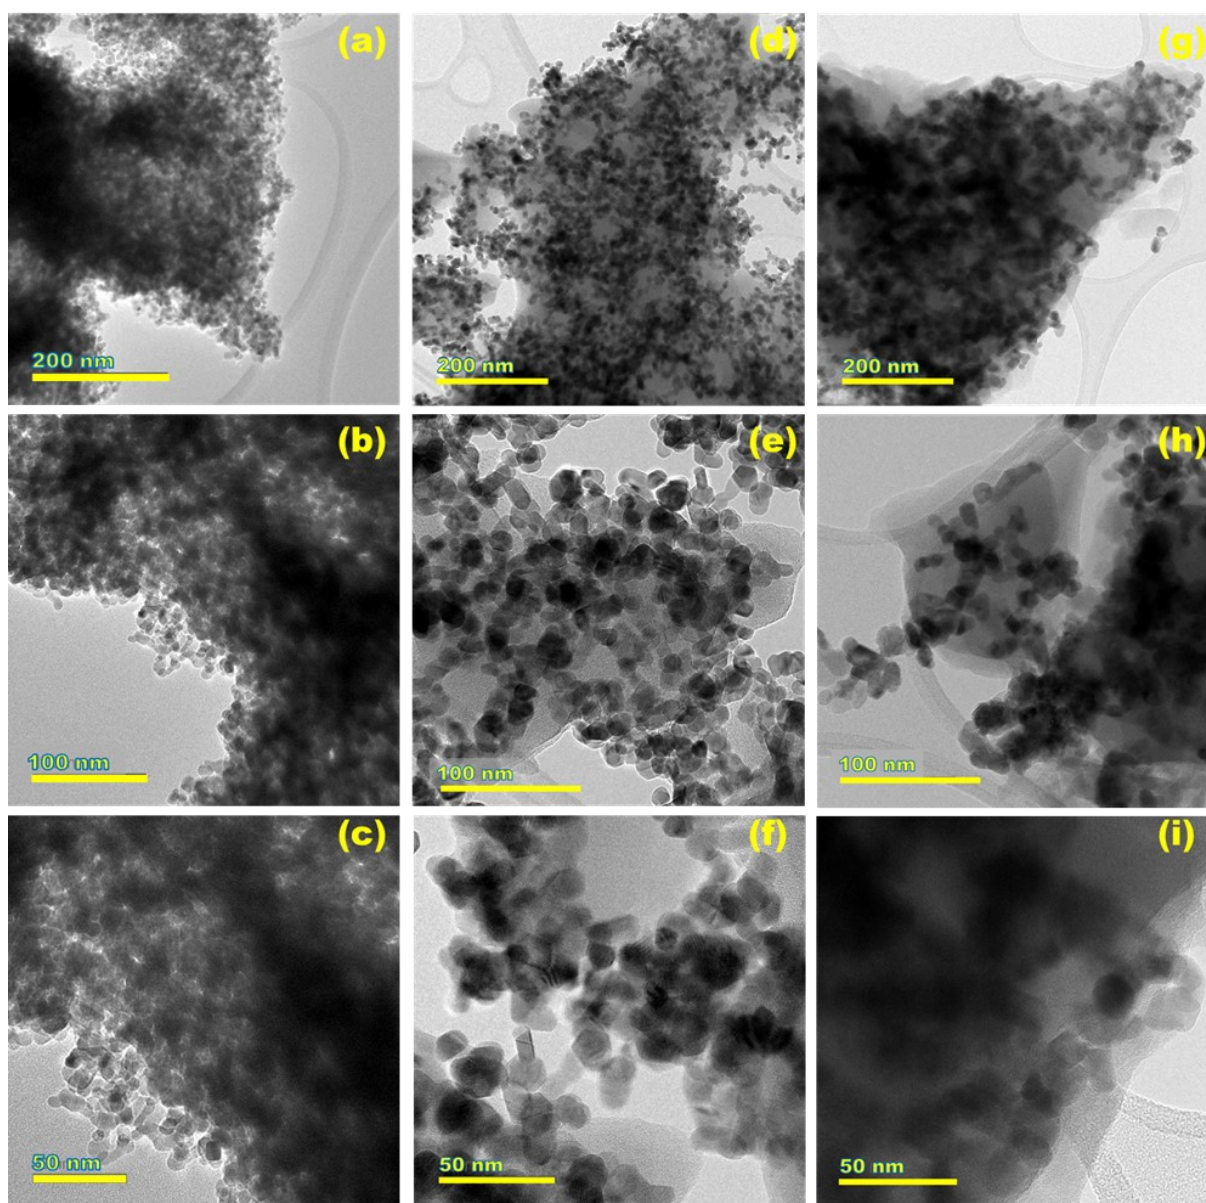

Fig. S1. Low magnification TEM images of (a-c) 1 nm ZIF-8/SnO<sub>2</sub>, (d-f) 3 nm ZIF-8/SnO<sub>2</sub> (g-i) 10 nm ZIF-8/SnO<sub>2</sub>.

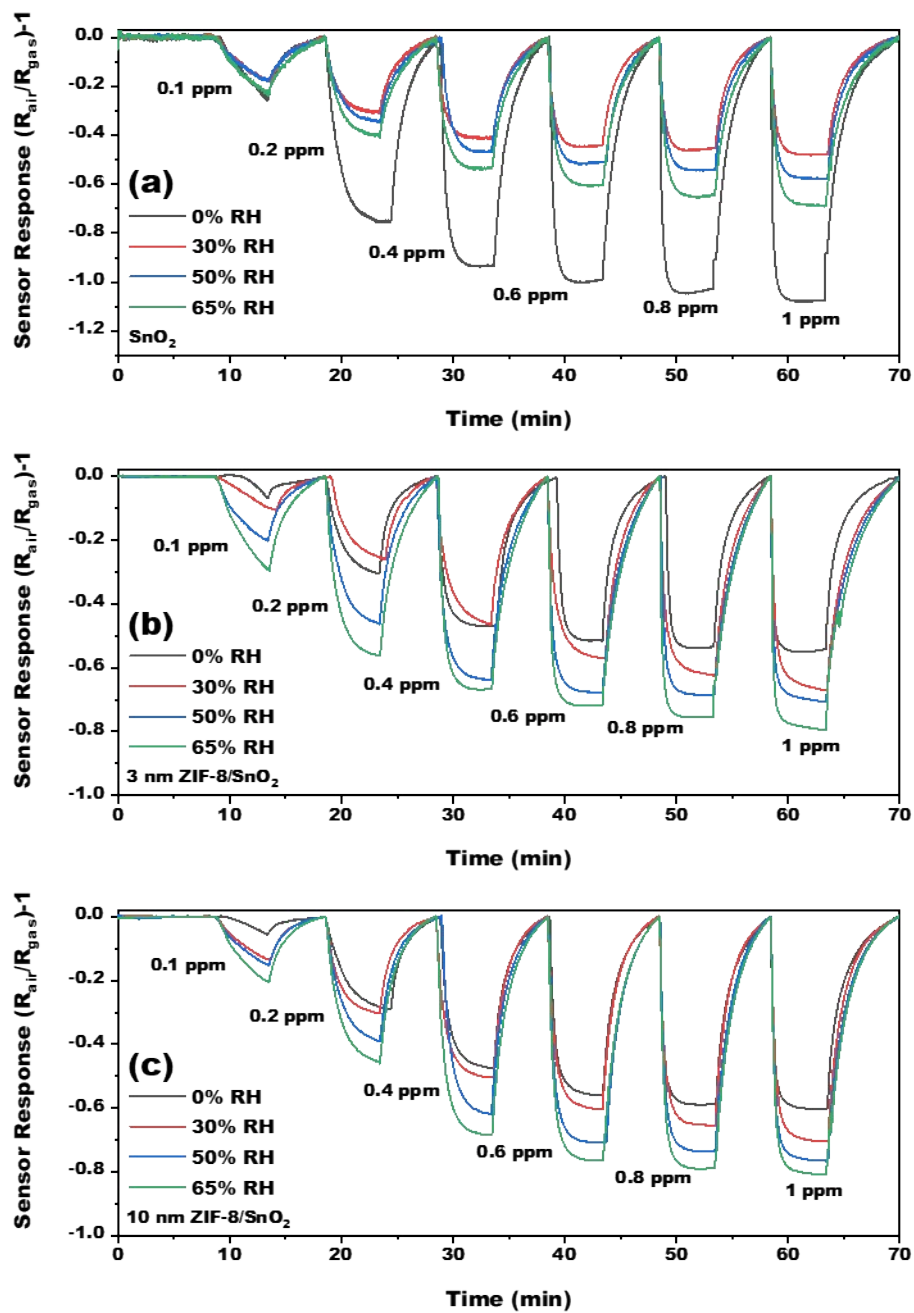

Fig. S2. Dynamic sensing response of (a)  $\text{SnO}_2$ , (b) 3 nm ZIF-8/ $\text{SnO}_2$  and (c) 10 nm ZIF-8/ $\text{SnO}_2$  towards  $\text{NO}_2$  as a function of concentration from 0.1–1 ppm under different RH conditions. All measurements were performed at 150 °C under solar irradiation.
